# Supplementary material
Source: PubMed Central journal article supplement (PMC5095402)

## Supplementary Legends and Figures S1 and S2

### **Familial ALS-linked mutations in *Profilin 1* exacerbate TDP-43-induced degeneration in the retina of *Drosophila Melanogaster* through an increase in the cytoplasmic localization of TDP-43.**

Koji Matsukawa, Tadafumi Hashimoto, Taisei Matsumoto, Ryoko Ihara, Takahiro Chihara, Masayuki Miura, Tomoko Wakabayashi, and Takeshi Iwatsubo

#### **Figure S1**

##### **Overexpression of *fALS* mutant *PFN1* exacerbated TDP-43-induced retinal degeneration.**

(A) Comparison of the expression levels of PFN1 (top panel), TDP-43 (middle panel) or  $\alpha$ -tubulin (bottom panel) in 3 independent lines of each TG flies. Immunoblot analyses of the heads of 5-day-old *gmr*-driven TG flies expressing singly *LacZ* or *TDP-43*, or doubly *TDP-43* and *wt*, *C71G* or *M114T mt PFN1*.  $\alpha$ -Tubulin levels are shown as a loading control (bottom panel). (B) Relative expression levels of PFN1 in (A) are shown. mean  $\pm$  SE. (C) H&E stained sections of eyes of 5-day-old *gmr*-driven TG flies overexpressing singly human *TDP-43*, or doubly *TDP-43* and *wt*, *C71G* or *M114T mutant PFN1*. Scale bar = 100  $\mu$ m. (D) Retinal thickness measured in TG flies expressing singly *LacZ* or *TDP-43*, or doubly *TDP-43* and *wt*, *C71G* or *M114T mutant PFN1*.  $N = 5\sim 7$ , mean  $\pm$  SE, (\*\*);  $p < 0.01$ , (\*\*\*) ;  $p < 0.001$ .

#### **Figure S2**

##### **Overexpression of *fALS* mutant *PFN1* did not affect FUS-induced retinal degeneration.**

(A) External surface pictures of eyes of 5-day-old *gmr*-driven TG flies overexpressing singly human *FUS*, or doubly *FUS* and *wt*, *C71G* or *M114T mutant PFN1*. The enlarged view of each eye is shown in lower right corner. (B) H&E stained sections of eyes of 5-day-old *gmr*-driven TG flies singly *FUS* or doubly *FUS* and *wt*, *C71G* or *M114T mutant PFN1*. Scale bar = 100  $\mu$ m. (C) Retinal thickness measured in TG flies singly *LacZ* or *FUS*, or doubly *FUS* and *wt*, *C71G* or *M114T mutant PFN1*.  $N = 10$ , mean  $\pm$  SE. (D) Comparison of the expression levels of FUS (upper panel) and PFN1 (middle panel). Immunoblot analyses of the heads of 5-day-old *gmr*-driven TG flies singly *LacZ* or *FUS*, or doubly *FUS* and *wt*, *C71G* or *M114T mt PFN1*.  $\alpha$ -Tubulin levels are shown as a loading control (bottom panel). Relative expression levels of FUS are indicated under the panels.  $N = 4$ , mean  $\pm$  SE.

**Figure S1**

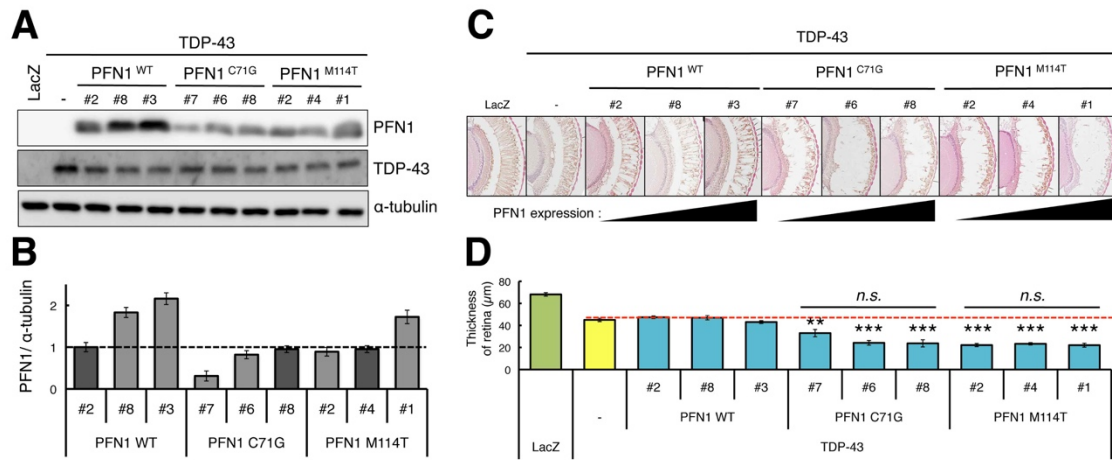

Figure S2

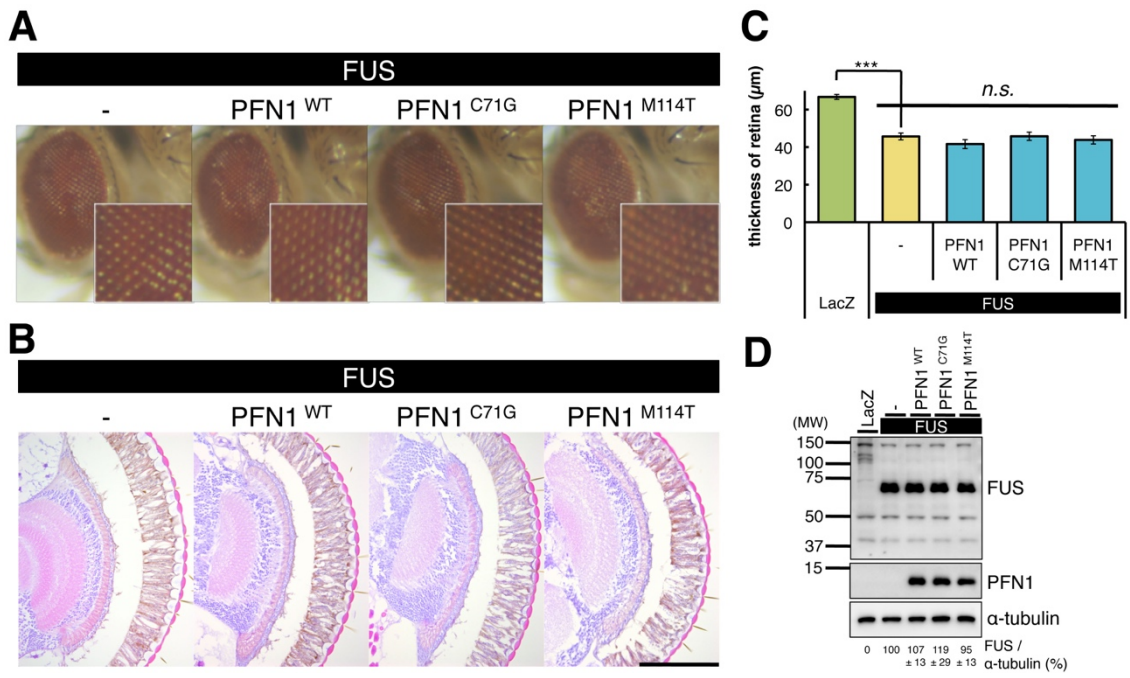

Supplement: 10.1074_M116.729152_jbc.M116.729152-1.pdf [file 10.1074_M116.729152_jbc.M116.729152-1.pdf]
